# Supplementary figures and images for: Digoxin–mortality: randomized vs. observational comparison in the DIG trial
Source: PubMed Central journal article supplement — Eur Heart J. 2019 Jun 18;40(40):3336–41. doi: 10.1093/eurheartj/ehz395 (PMC6801940; doi:10.1093/eurheartj/ehz395), 2019-06-18

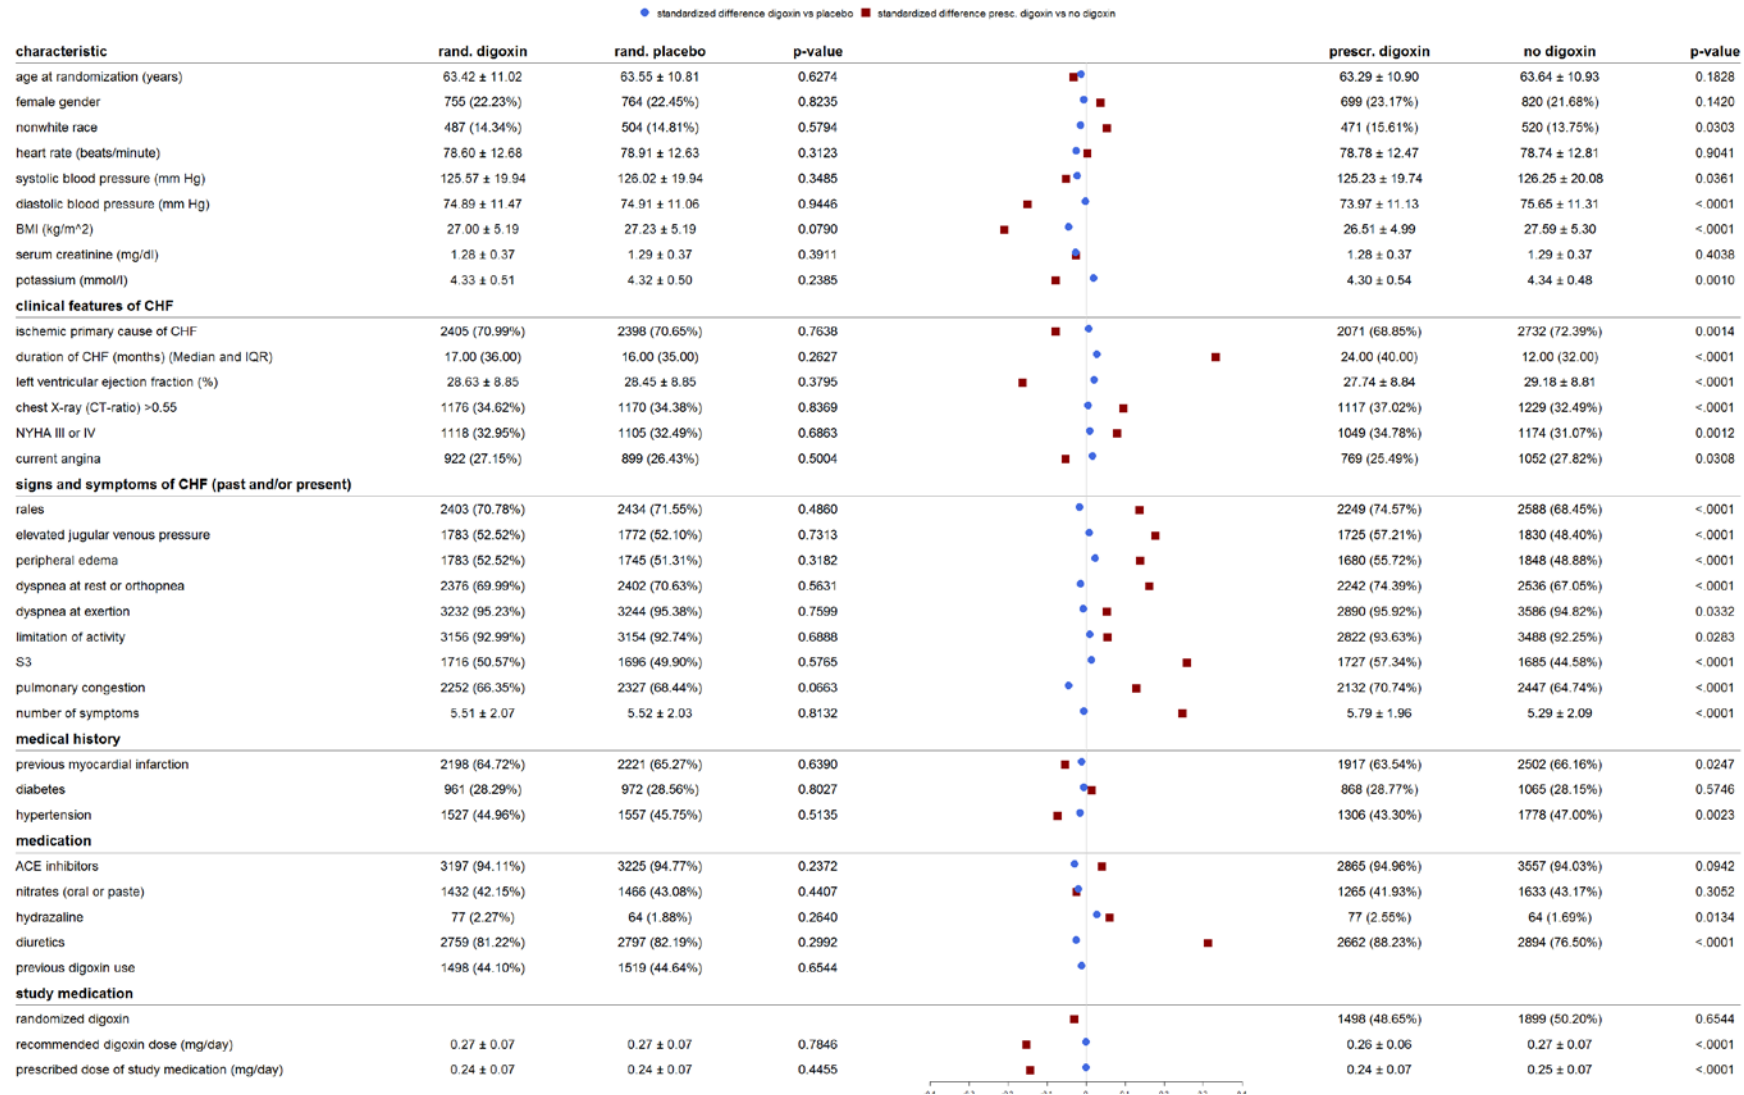

Appendix 1: more detailed version of Figure 2 with details on baseline characteristics

Supplement: ehz395_supplementary_appendix.pdf [file ehz395_supplementary_appendix.pdf]
